# Supplementary material for: Acute hypoxia influences collagen and matrix metalloproteinase expression by human keratoconus cells in vitro
Source: PubMed Central journal article supplement (PMC5398580; doi:10.1371/journal.pone.0176017), 2017-04-20
Supplement: pone.0176017.s003.pdf [file pone.0176017.s003.pdf]

ACC

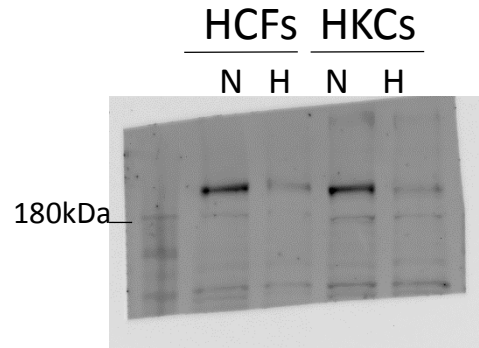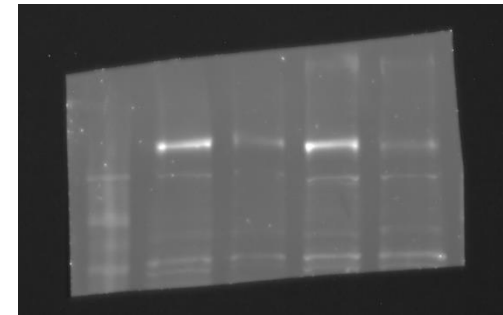

Uncropped,  
non-inverted  
blot

Uncropped western blot of protein isolated from HCFs and HKCs following hypoxia exposure. Blot was cut following blocking and prior to incubation with primary antibody.

HIF-1 $\alpha$

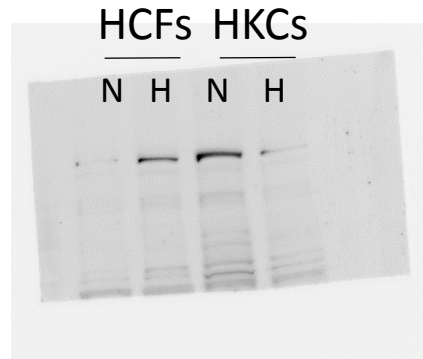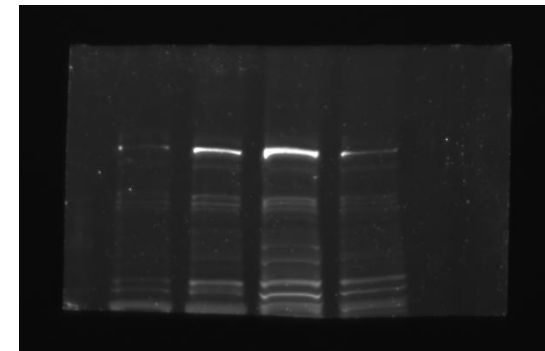

Uncropped,  
non-inverted  
blot

Uncropped western blot of protein isolated from HCFs and HKCs following hypoxia exposure. Blot was cut following blocking and prior to incubation with primary antibody.

# ARNT

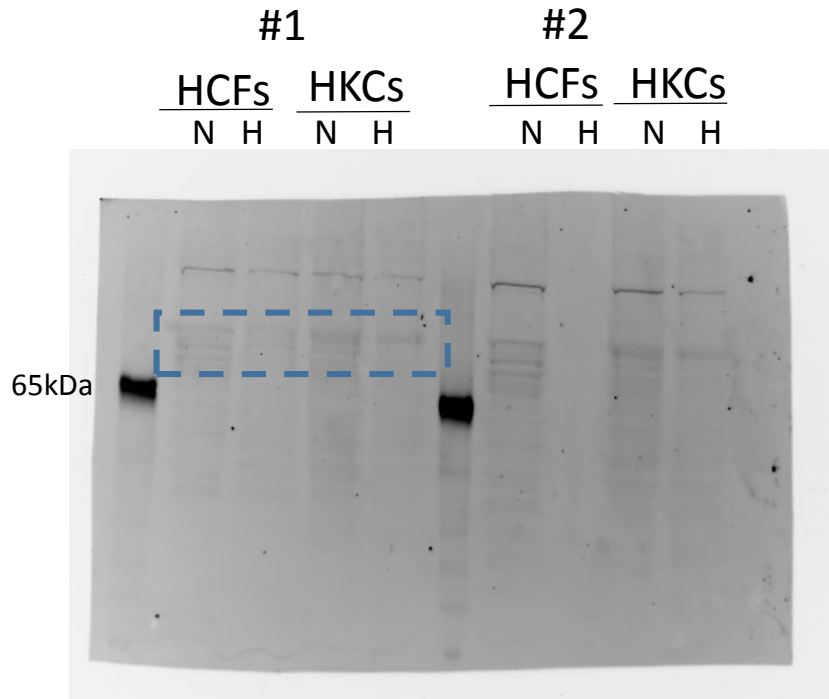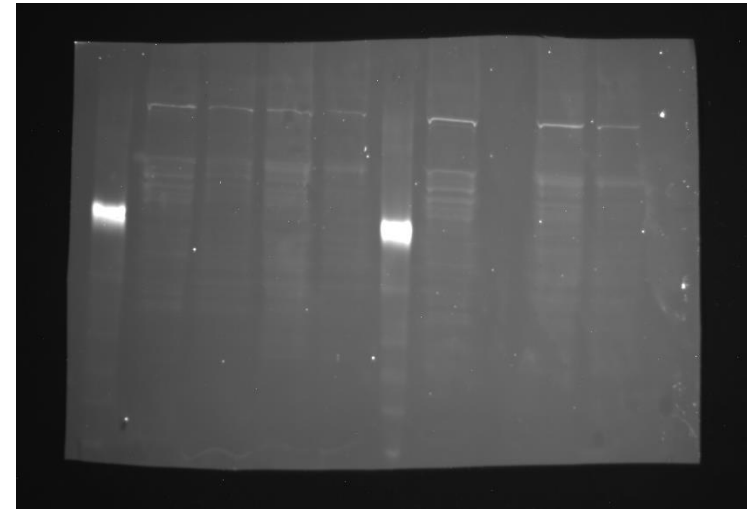

Uncropped,  
non-inverted  
blot

Uncropped blots of protein isolated from HCFs and HKCs following hypoxia exposure. Dashed blue box denotes cropped area shown in Fig 1A. Blot was cut following blocking and prior to incubation with primary antibody.

MCD

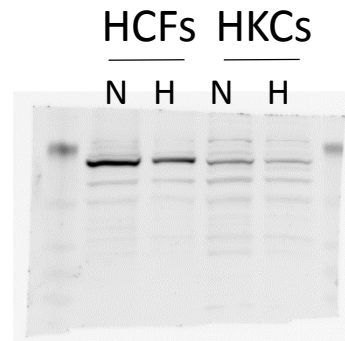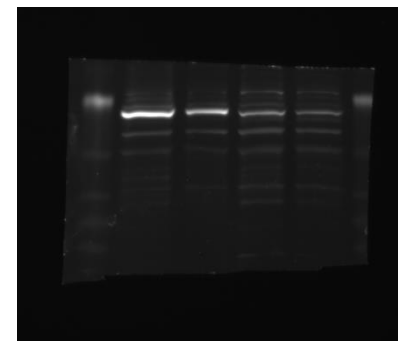

Uncropped,  
non-inverted  
blot

Uncropped western blot of protein isolated from HCFs and HKCs following hypoxia exposure. Blot was cut following blocking and prior to incubation with primary antibody.

# Lactoferrin

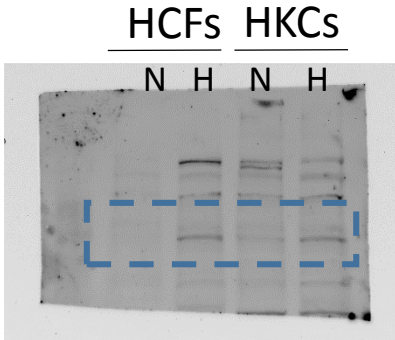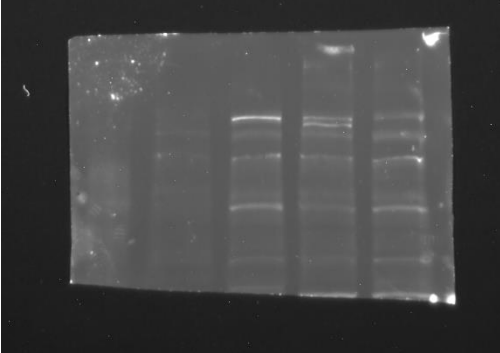

Uncropped,  
non-inverted  
blot

Uncropped blots of protein isolated from HCFs and HKCs following hypoxia exposure. Dashed blue box denotes cropped area shown in Fig 1A. Blot was cut following blocking and prior to incubation with primary antibody.

# GAPDH

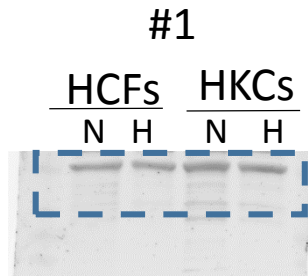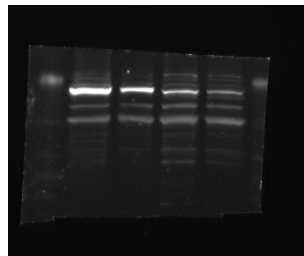

Uncropped,  
non-inverted  
blot

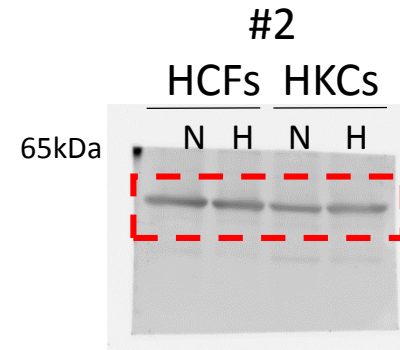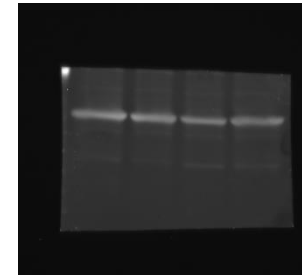

Uncropped,  
non-inverted  
blot

Uncropped blots of protein isolated from HCFs and HKCs following hypoxia exposure. Dashed blue box denotes cropped area shown in Fig 1A and dashed red box denotes cropped area shown in Fig 3A. Blot was cut following blocking and prior to incubation with primary antibody.

# Collagen I

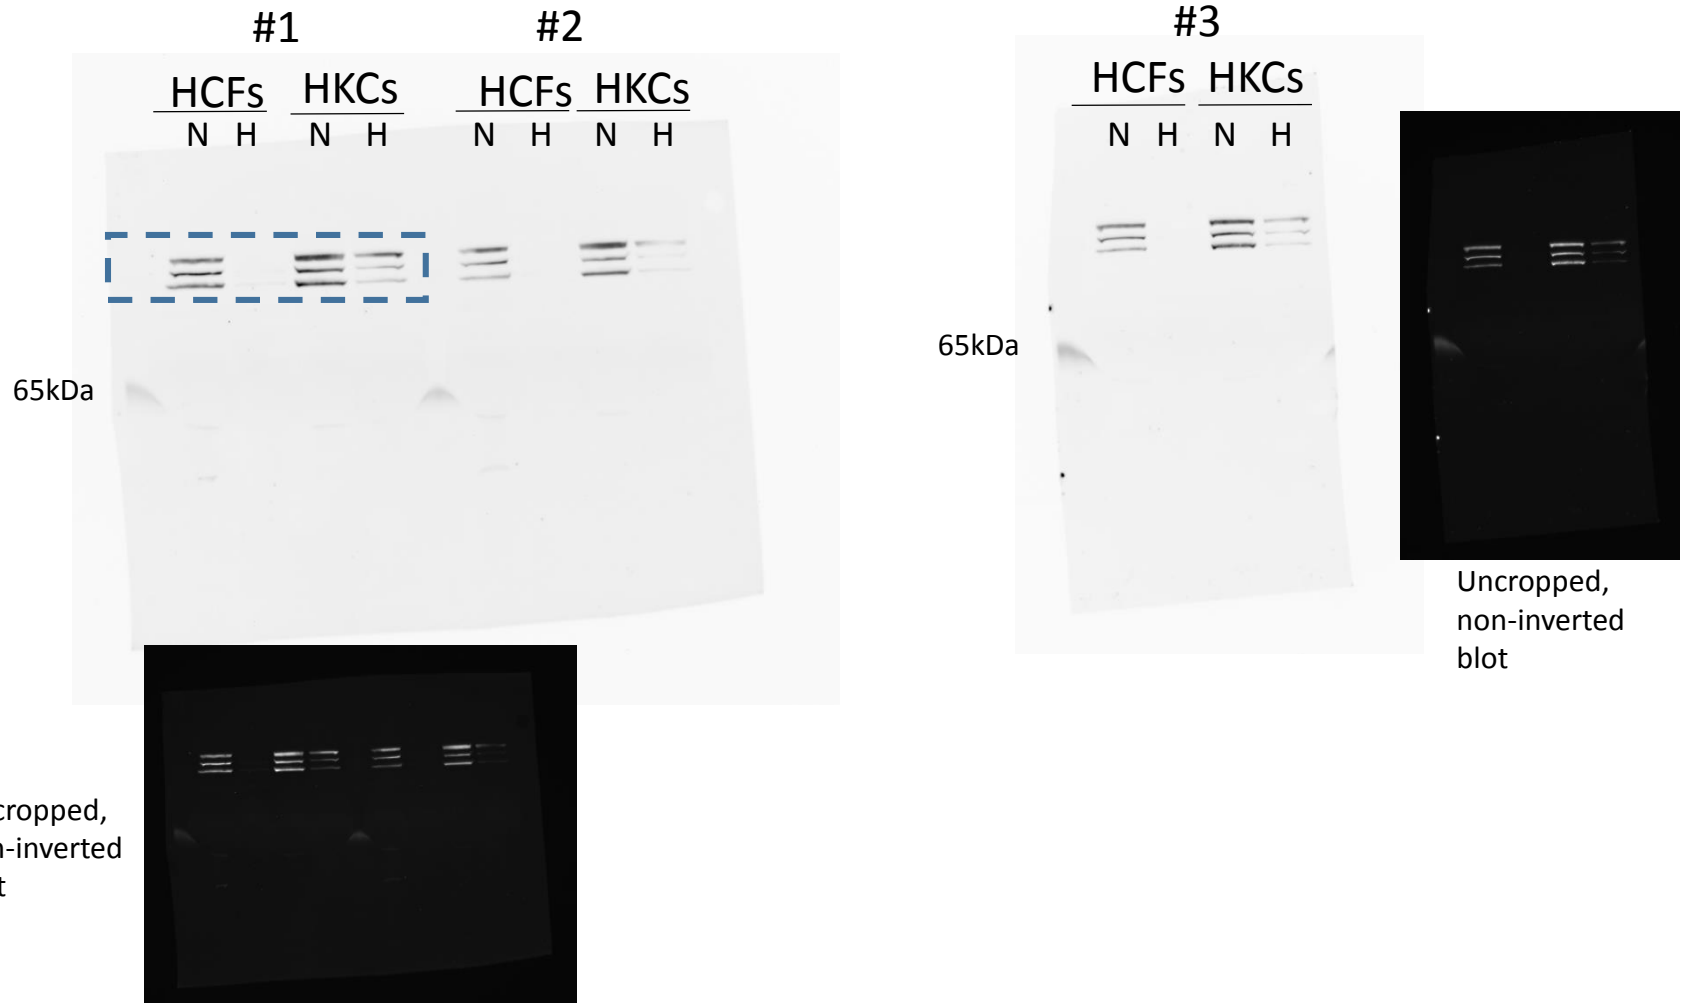

Uncropped blots of media isolated from HCFs and HKCs following hypoxia exposure for 3 replicates. Dashed blue box denotes cropped area shown in Fig 2.

# Collagen III

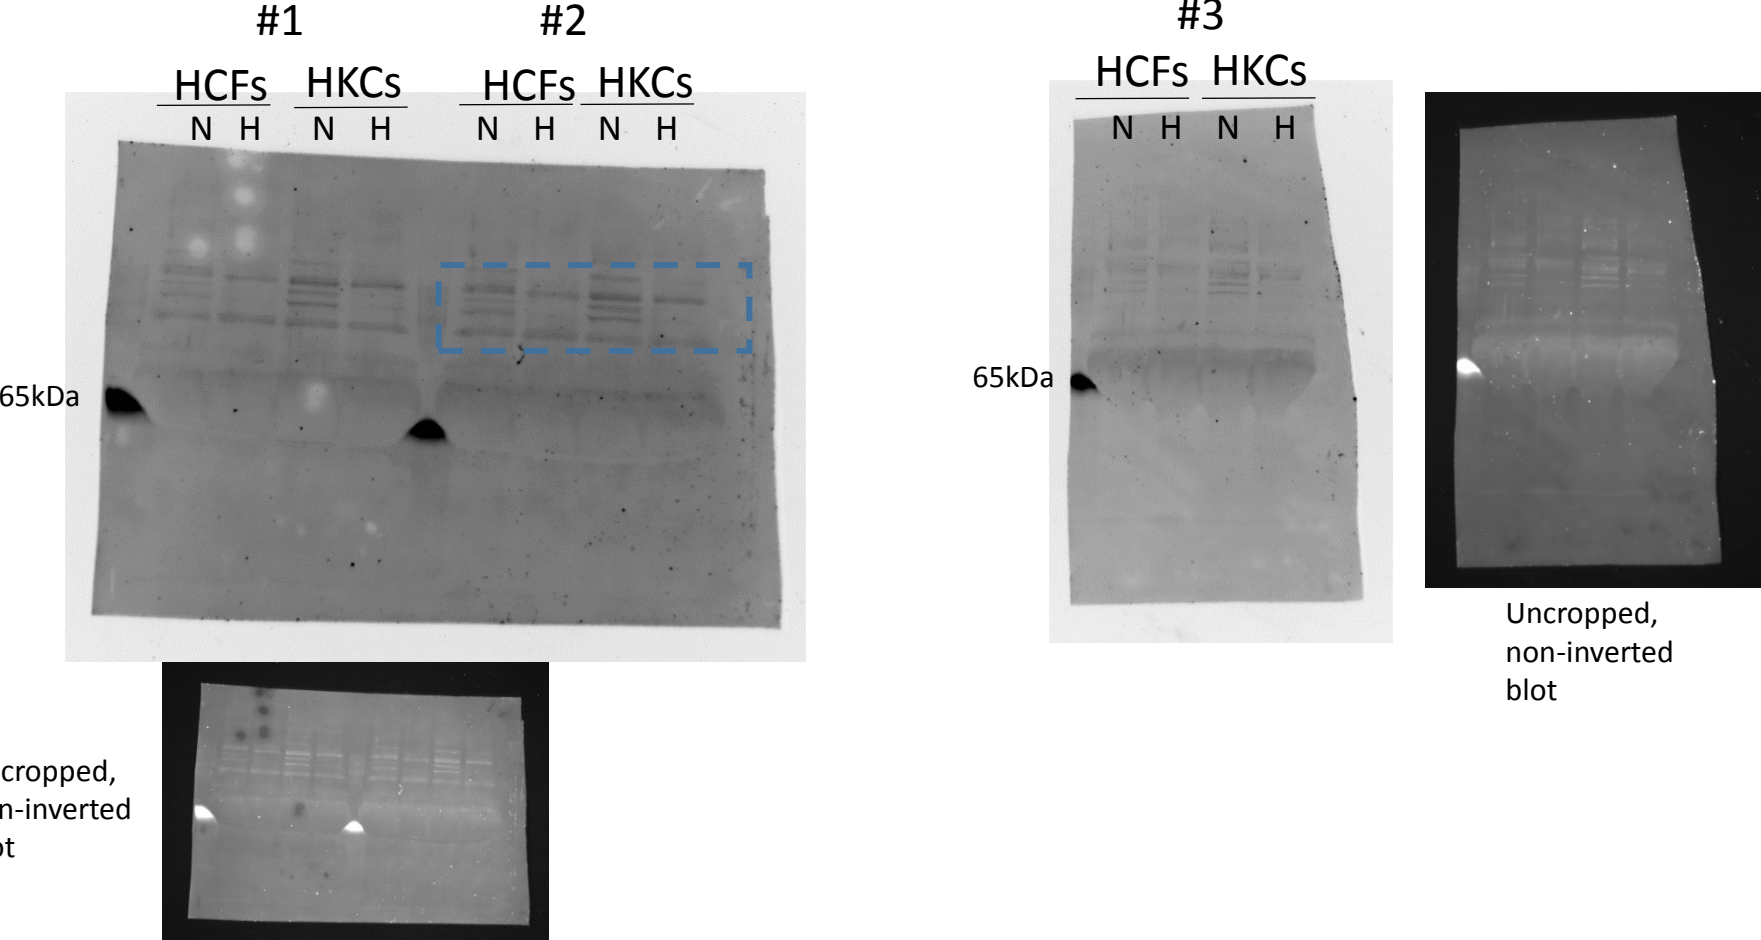

Uncropped blots of media isolated from HCFs and HKCs following hypoxia exposure for 3 replicates. Dashed blue box denotes cropped area shown in Fig 2. Large non-specific binding at 65kDa likely corresponds to albumin, a protein found in media containing FBS.



## Collagen V

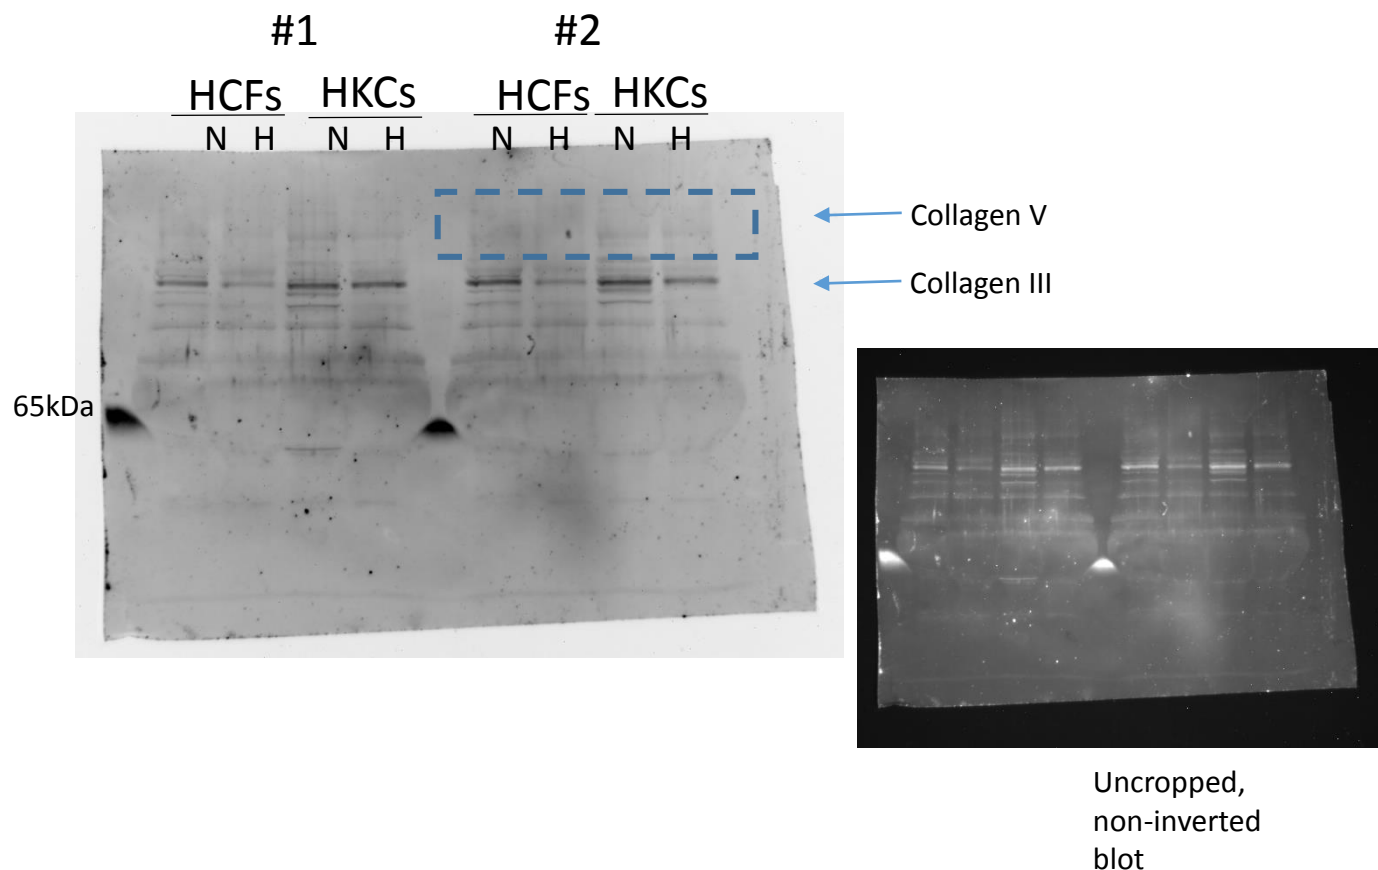

Uncropped blots of media isolated from HCFs and HKCs following hypoxia exposure for 2 replicates. Collagen III blot shown on previous page was re-probed with Collagen V antibody. Dashed blue box denotes cropped area shown in Fig 2.

# MMP-9

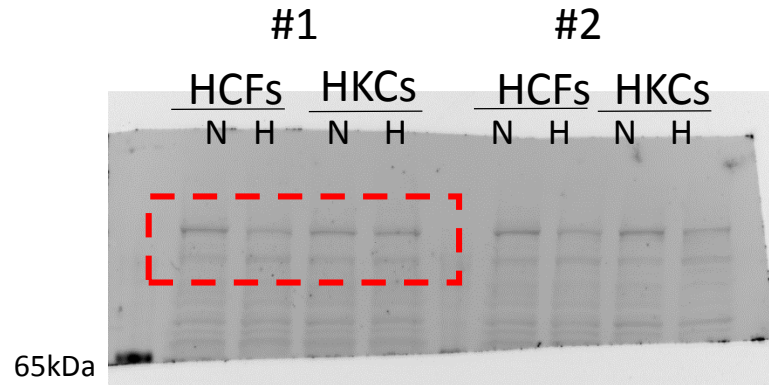

Uncropped,  
non-inverted  
blot

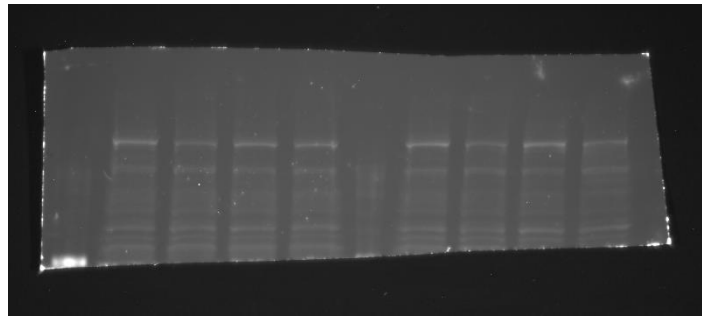

Uncropped blots of protein isolated from HCFs and HKCs following hypoxia exposure. Dashed red box denotes cropped area shown in Fig 3A.

# MMP-2

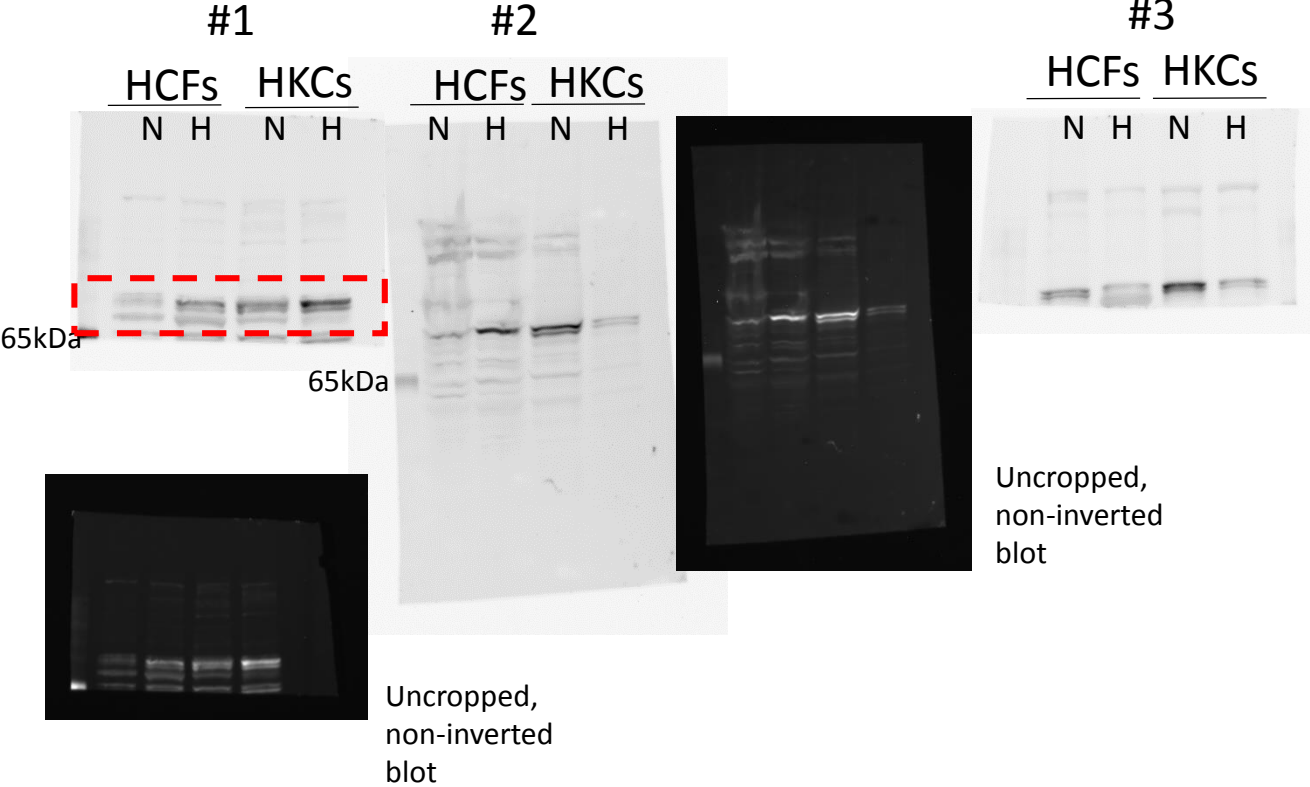

Uncropped blots of protein isolated from HCFs and HKCs following hypoxia exposure for 3 replicates. Dashed red box denotes cropped area shown in Fig 3A.

# MMP-1

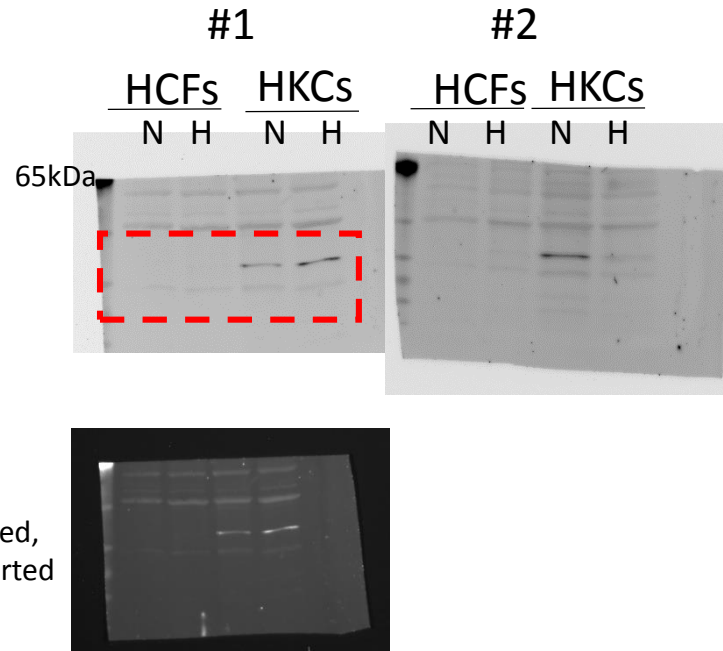

Uncropped blots of protein isolated from HCFs and HKCs following hypoxia exposure. Dashed red box denotes cropped area shown in Fig 3A.

# MMP-13

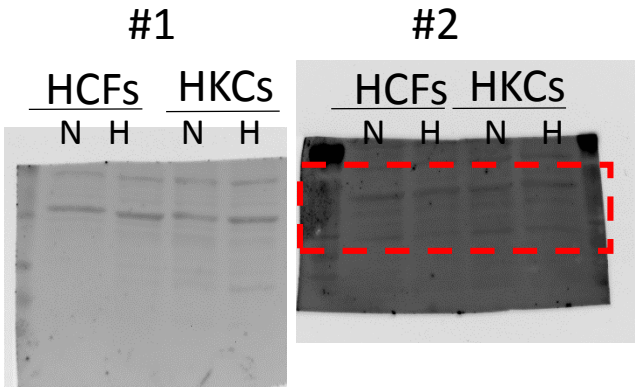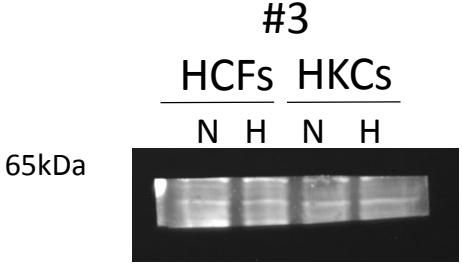

Uncropped, non-inverted blot

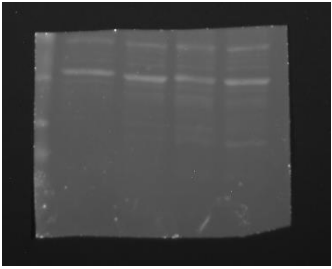

Uncropped, non-inverted blot

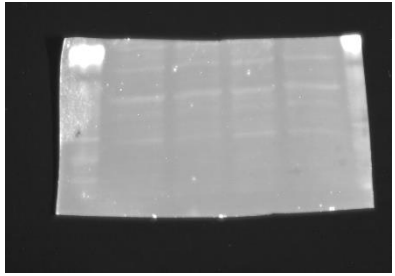

Uncropped blots of protein isolated from HCFs and HKCs following hypoxia exposure for 3 replicates. Dashed red box denotes cropped area shown in Fig 3A.

MMP-3

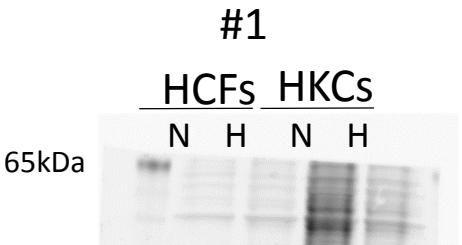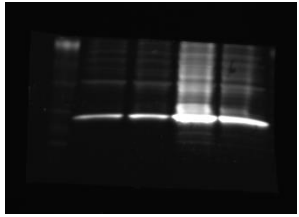

Uncropped,  
non-inverted  
blot

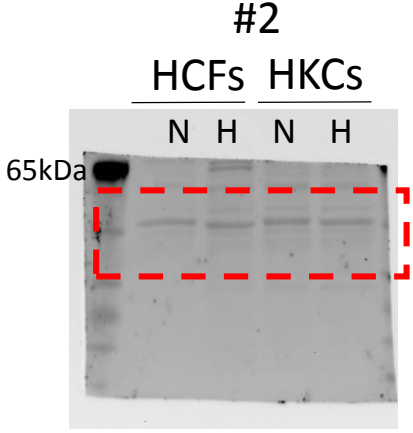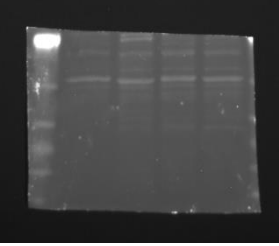

Uncropped,  
non-inverted  
blot

Uncropped blots of protein isolated from HCFs and HKCs following hypoxia exposure. Dashed red box denotes cropped area shown in Fig 3A.

Col V

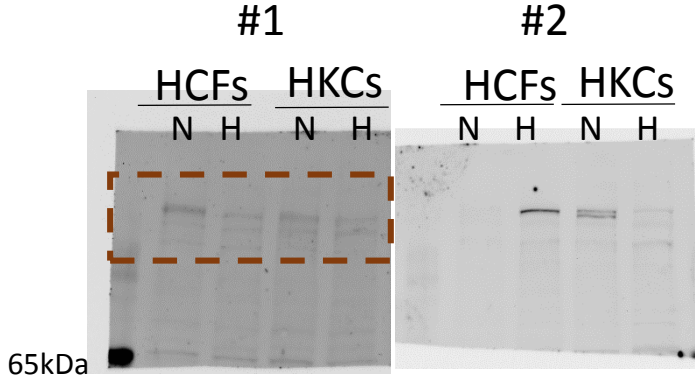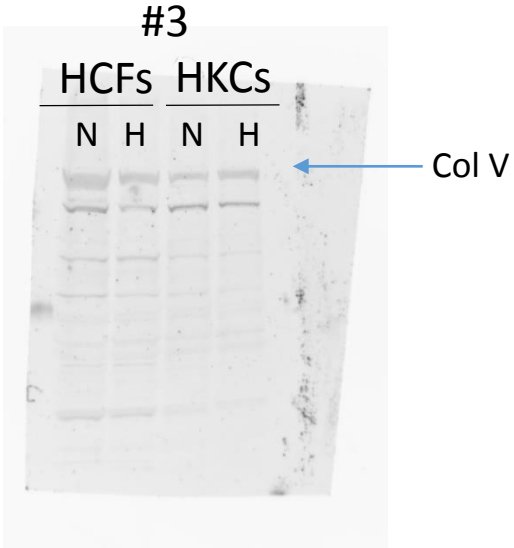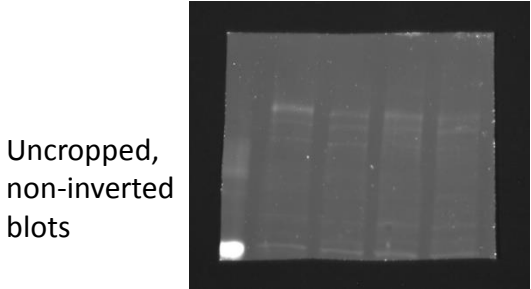

Uncropped blots of protein isolated from HCFs and HKCs following hypoxia exposure for 3 replicates. Dashed brown box denotes cropped area shown in Fig 3G.

Col I

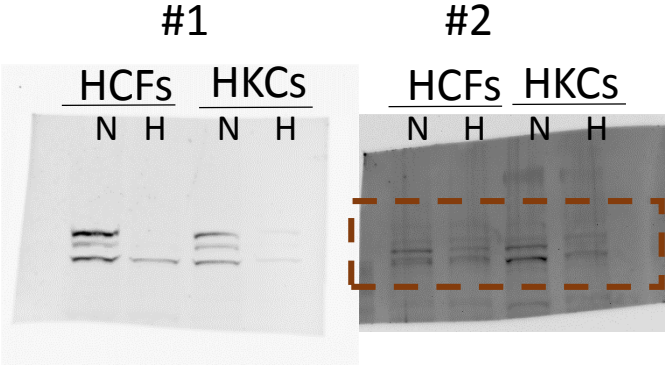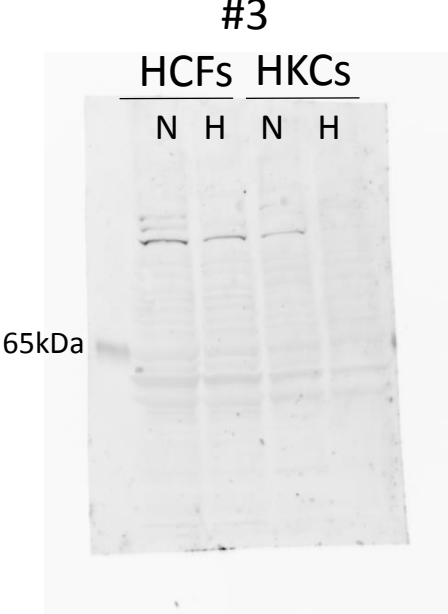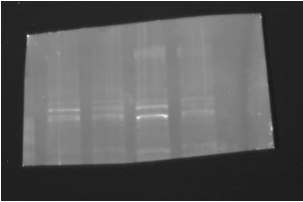

Uncropped,  
non-inverted  
blot

Uncropped blots of protein isolated from HCFs and HKCs following hypoxia exposure for 3 replicates. Dashed brown box denotes cropped area shown in Fig 3G.



Col III

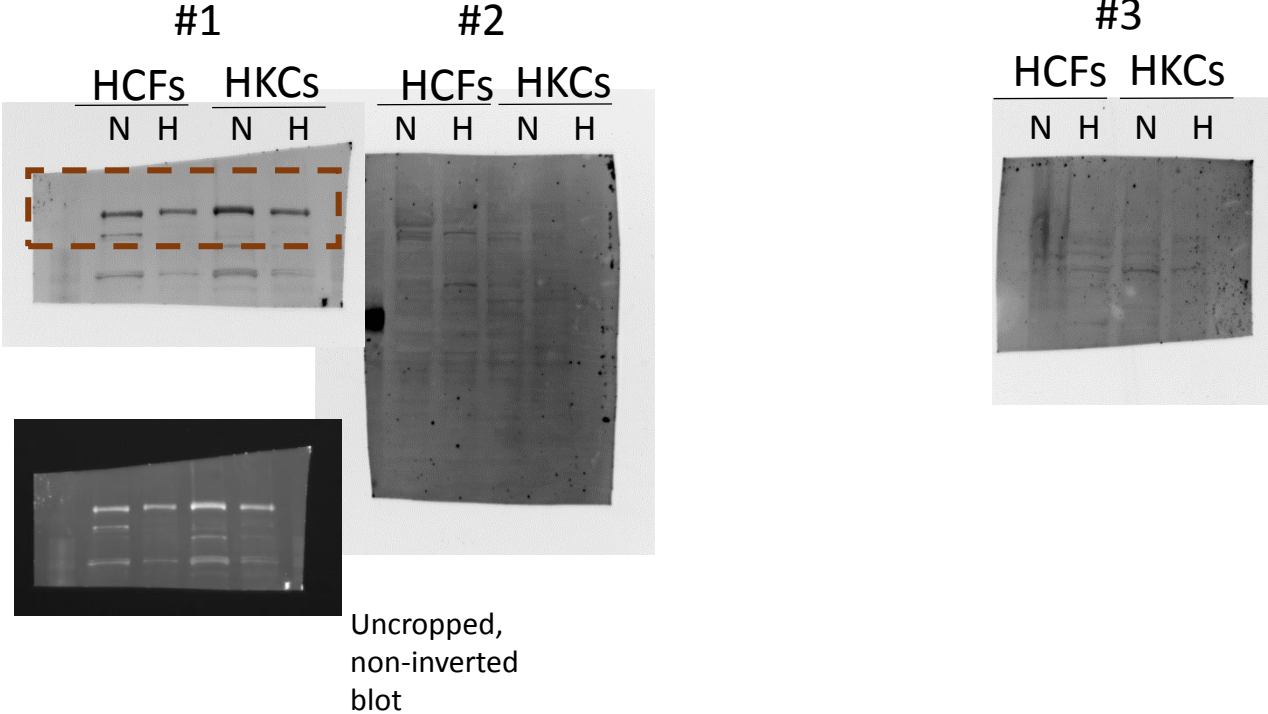

Uncropped blots of protein isolated from HCFs and HKCs following hypoxia exposure for 3 replicates. Dashed brown box denotes cropped area shown in Fig 3G.

Keratocan

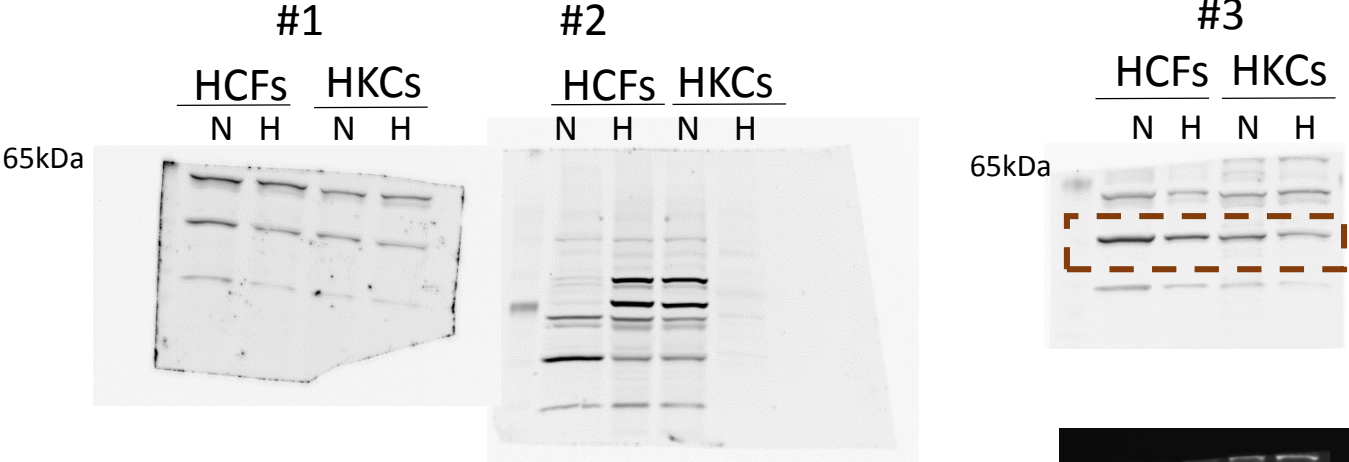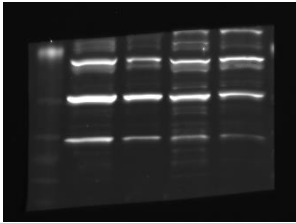

Uncropped,  
non-inverted  
blot

Uncropped blots of protein isolated from HCFs and HKCs following hypoxia exposure for 3 replicates. Dashed brown box denotes cropped area shown in Fig 3G.

$\beta$ -Actin

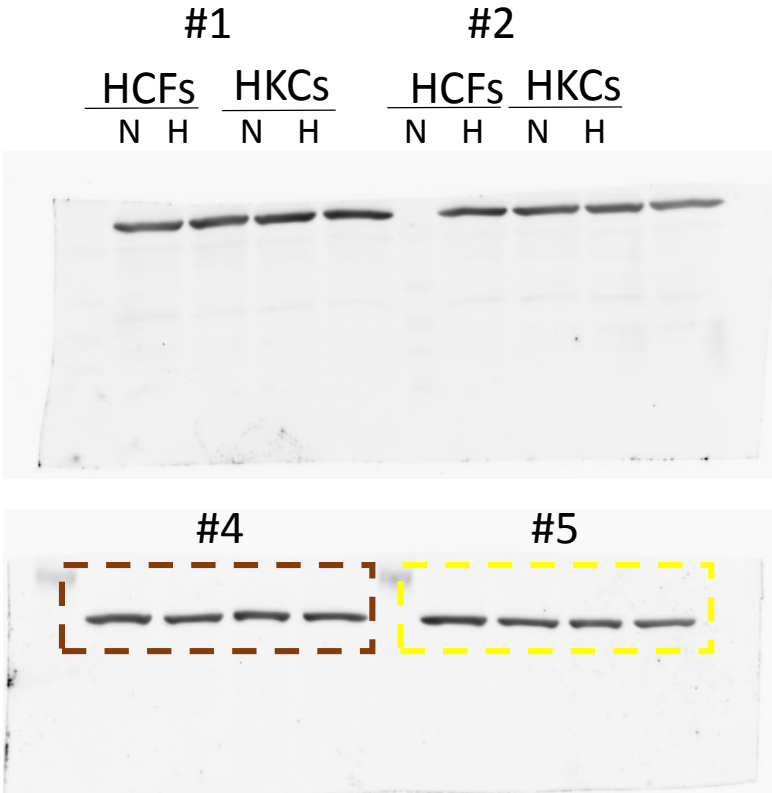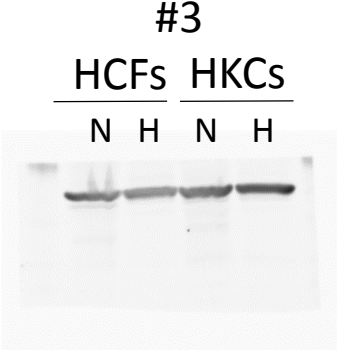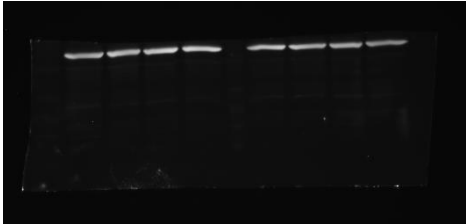

Uncropped,  
non-inverted  
blot

Uncropped blots of protein isolated from HCFs and HKCs following hypoxia exposure for 3 replicates. Dashed brown box denotes cropped area shown in Fig 3G, and dashed yellow box denotes cropped area shown in Fig 3L.

FAK

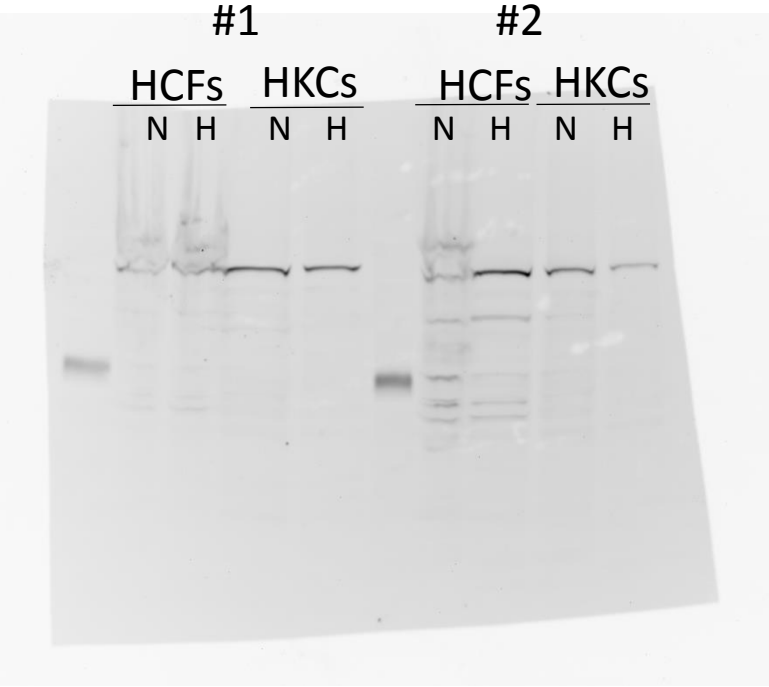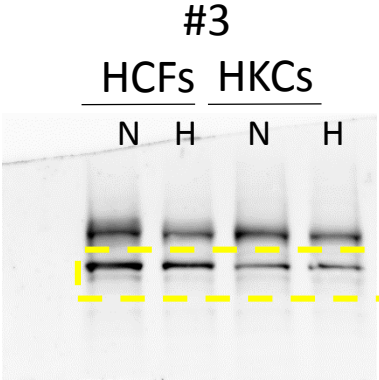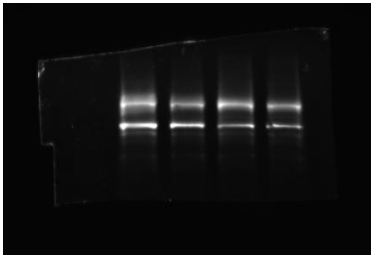

Uncropped,  
non-inverted  
blot

Uncropped blots of protein isolated from HCFs and HKCs following hypoxia exposure for 3 replicates. Dashed yellow box denotes cropped area shown in Fig 3L.

pFAK

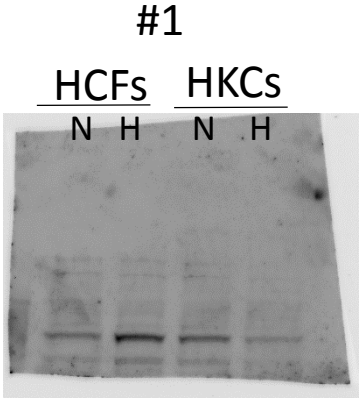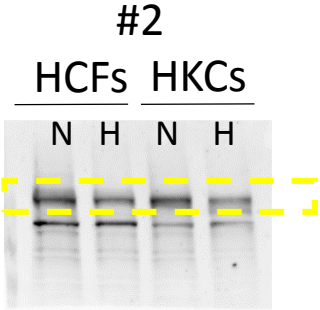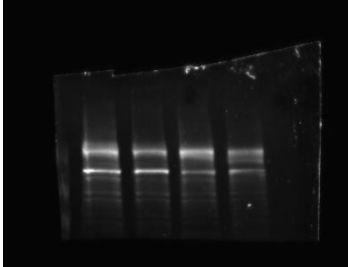

Uncropped,  
non-inverted  
blot

Uncropped blots of protein isolated from HCFs and HKCs following hypoxia exposure for 2 replicates. Dashed yellow box denotes cropped area shown in Fig 3L.
